# Supplementary material for: Bioluminescent and spectroscopic properties of His—Trp—Tyr triad mutants of obelin and aequorin
Source: Royal Society of Chemistry journal article supplement (doi:10.1039/c3pp00002h), 2013-03-05
Supplement: c3pp00002h.pdf [file c3pp00002h.pdf]

Electronic Supplementary Information for

**Bioluminescent and spectroscopic properties of His–Trp–Tyr triad mutants of obelin and aequorin**

Elena V. Ereemeeva,<sup>a,b,c</sup> Svetlana V. Markova,<sup>a,c</sup> Ludmila A. Frank,<sup>a,c</sup> Antonie J.W.G. Visser,<sup>b</sup> Willem J.H. van Berkel,<sup>b</sup> and Eugene S. Vysotski\*<sup>a,c</sup>

<sup>a</sup> Photobiology Laboratory, Institute of Biophysics, Russian Academy of Sciences, Siberian Branch, Krasnoyarsk, 660036, Russia

<sup>b</sup> Laboratory of Biochemistry, Wageningen University, 6703 HA Wageningen, The Netherlands

<sup>c</sup> Laboratory of Bioluminescence Biotechnology, Institute of Fundamental Biology and Biotechnology, Siberian Federal University, Krasnoyarsk 660041, Russia

\*Corresponding author:

Fax: +7 (391) 243-3400; Tel: +7 (391) 249-4430;

E-mail: <eugene.vysotski@gmail.com> or <eugene\_vysotski@ibp.ru>

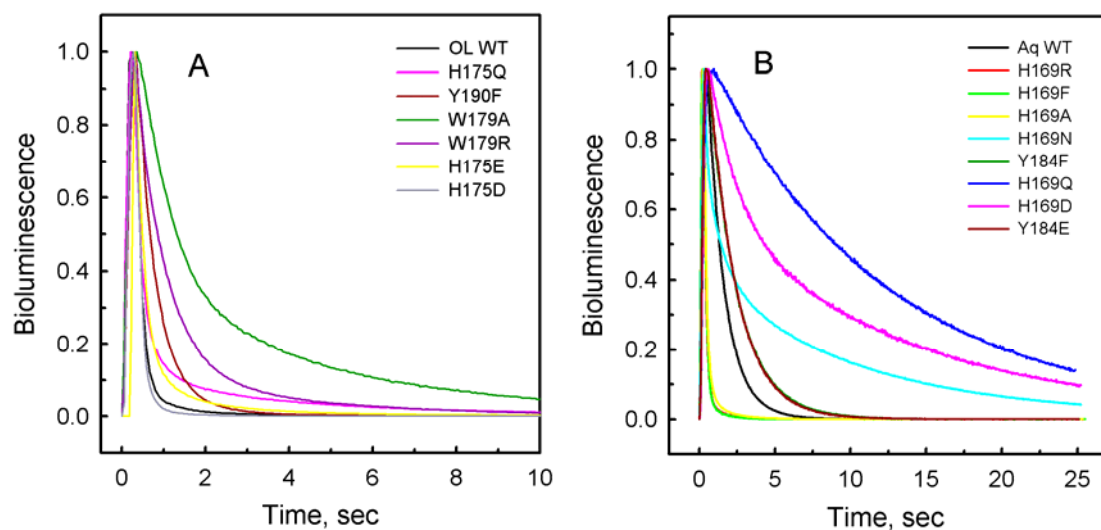

**Figure S1.** Normalized kinetics of bioluminescence reaction of obelin (A), aequorin (B), and some of their mutants. Bioluminescence decay rate constants shown in Table 2 were calculated by one- ( $y = y_0 + ae^{-k_1x}$ ) or two-exponential ( $y = y_0 + ae^{-k_1x} + be^{-k_2x}$ ) fitting using averaging of 3 decay curves.

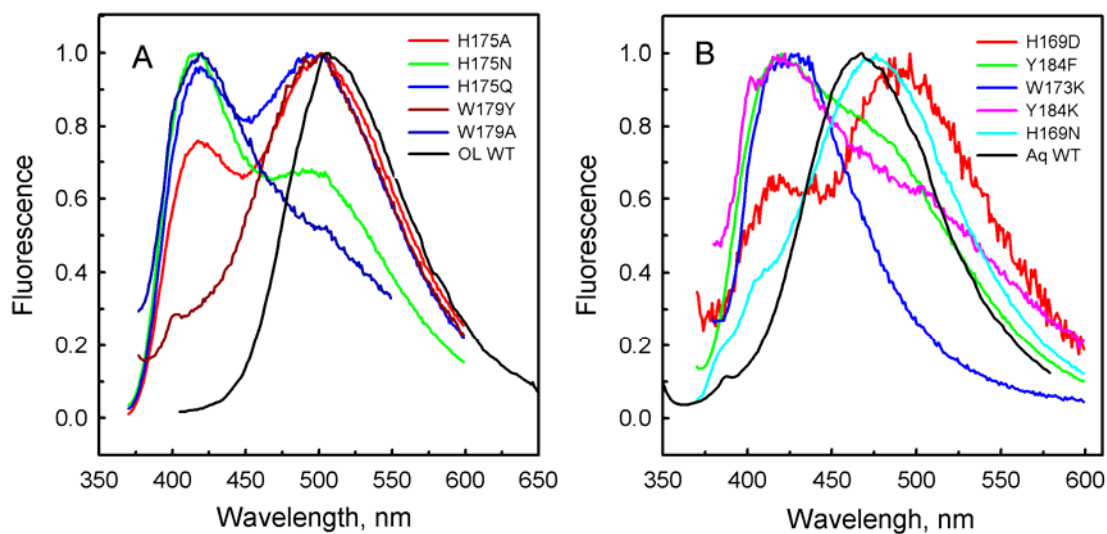

**Figure S2.** Normalized fluorescence spectra of obelin (A), aequorin (B) and their mutants at pH 7.0.
